# Supplementary material
Source: HighWire-hosted journal article supplement (http://www.cmaj.ca/highwire/filestream/57594/field_highwire_adjunct_files/0/tables.pdf)
Supplement: tables.pdf [file tables.pdf]

**Table 1: Criteria used to compare letters, numbers, symbols and words to communicate levels of evidence and strength of recommendations**

| Criterion              | Question                                                                                     |
|------------------------|----------------------------------------------------------------------------------------------|
| Ease of comprehension  | Is the meaning likely to be understood intuitively?                                          |
| Associations           | Are there associations with other grading systems that may be helpful or problematic?        |
| Succinctness           | Is the presentation concise?                                                                 |
| Literacy               | Is the presentation likely to be easily understood by people with different literacy levels? |
| Language               | Is the presentation likely to be easily understood by people speaking different languages?   |
| Culture                | Is the presentation likely to be easily understood across different cultures?                |
| Verbalization          | Is the presentation likely to be easily communicated verbally?                               |
| Clear number of levels | Is it clear how many categories there are?                                                   |
| Clear direction        | Is it clear which grade means best and which means worst?                                    |
| Clear limits           | Are the lower and upper limits intuitively clear?                                            |
| Conveys 2 dimensions   | Can 2 dimensions be represented easily?                                                      |

**Table 2: Potential problems with letters, numbers, symbols and words**

| Criterion*             | Letters                                                                    | Numbers                                                        | Symbols                                                   | Words                                                    |
|------------------------|----------------------------------------------------------------------------|----------------------------------------------------------------|-----------------------------------------------------------|----------------------------------------------------------|
| Ease of comprehension  | No problem                                                                 | No problem                                                     | Depends on the symbol                                     | Depends on the choice and number of words                |
| Associations           | May be misleading due to associations with grading systems used in schools | May suggest that judgments are more quantitative than they are | Depends on the choice of symbols                          | Depends on the choice of words                           |
| Succinct               | No problem                                                                 | No problem                                                     | No problem                                                | May be less succinct                                     |
| Literacy               | No problem                                                                 | No problem                                                     | No problem                                                | May be a problem                                         |
| Language               | May be a problem                                                           | No problem                                                     | No problem                                                | May be a problem with translation                        |
| Verbalization          | May be a problem as there is no universal alphabet                         | No problem                                                     | May be a problem                                          | No problem                                               |
| Culture                | Letters may be interpreted differently in different cultures               | No problem                                                     | Symbols may have different meanings in different cultures | No problem                                               |
| Number of levels clear | Not clear                                                                  | Not clear                                                      | Depends on the symbol                                     | Depends on the choice of words                           |
| Direction clear        | Probably generally understood that A is best                               | May sometimes be confusion whether higher is better or worse   | Depends on the symbol                                     | No problem                                               |
| Limits clear           | Upper limit clear; lower limit may not be clear                            | May not be clear                                               | Depends on the symbol                                     | May depend on the choice of words                        |
| Conveys 2 dimensions   | May be a problem                                                           | May be a problem                                               | Depends on the symbol                                     | Possible to use different words for different dimensions |

\*See Table 1.
